# Supplementary material for: Prevalence and risk factors for sexual assault among class 6 female students in unplanned settlements of Nairobi, Kenya: Baseline analysis from the IMPower & Sources of Strength cluster randomized controlled trial
Source: PubMed Central journal article supplement (PMC6553848; doi:10.1371/journal.pone.0213359), 2019-06-06
Supplement: pone.0213359.s001.pdf [file pone.0213359.s001.pdf]

|             |                                                                                  |                                                                                                                                                        |
|-------------|----------------------------------------------------------------------------------|--------------------------------------------------------------------------------------------------------------------------------------------------------|
| <b>FL8</b>  | How far from your house do you have to go for drinking water?                    | <input type="radio"/> Very Near <input type="radio"/> Near <input type="radio"/> Somewhat Far <input type="radio"/> Far <input type="radio"/> Very Far |
| <b>FL9</b>  | Do you get water at home?<br>How long does it take you to get water, in minutes? | <input type="radio"/> Yes <input type="radio"/> No<br><br># Minutes: <input type="text"/> <input type="text"/>                                         |
| <b>FL10</b> | How many rooms do you have at home, including bathrooms?                         | <input type="text"/> <input type="text"/>                                                                                                              |
| <b>FL11</b> | Do you have a working television at home?                                        | <input type="radio"/> Yes <input type="radio"/> No                                                                                                     |

**Peer Victimization Scale (PVS)**

Below is a list of things that some children do to other children. Please make an X in the bubble of the best answer. How many times within the past 2 weeks has another child done these things to you?

|              |                                                         |                                                                                                                       |
|--------------|---------------------------------------------------------|-----------------------------------------------------------------------------------------------------------------------|
| <b>PVS1</b>  | Called me bad names                                     | <input type="radio"/> Never <input type="radio"/> Once <input type="radio"/> 2-3 times <input type="radio"/> 4+ times |
| <b>PVS2</b>  | Tried to get me in trouble with my friends              | <input type="radio"/> Never <input type="radio"/> Once <input type="radio"/> 2-3 times <input type="radio"/> 4+ times |
| <b>PVS3</b>  | Took something of mine without permission               | <input type="radio"/> Never <input type="radio"/> Once <input type="radio"/> 2-3 times <input type="radio"/> 4+ times |
| <b>PVS4</b>  | Made fun of me because of my appearance                 | <input type="radio"/> Never <input type="radio"/> Once <input type="radio"/> 2-3 times <input type="radio"/> 4+ times |
| <b>PVS5</b>  | Made fun of me for some reason other than my appearance | <input type="radio"/> Never <input type="radio"/> Once <input type="radio"/> 2-3 times <input type="radio"/> 4+ times |
| <b>PVS6</b>  | Tripped me to make me fall                              | <input type="radio"/> Never <input type="radio"/> Once <input type="radio"/> 2-3 times <input type="radio"/> 4+ times |
| <b>PVS7</b>  | Pushed me to hurt me                                    | <input type="radio"/> Never <input type="radio"/> Once <input type="radio"/> 2-3 times <input type="radio"/> 4+ times |
| <b>PVS8</b>  | Hurt me physically                                      | <input type="radio"/> Never <input type="radio"/> Once <input type="radio"/> 2-3 times <input type="radio"/> 4+ times |
| <b>PVS9</b>  | Beat me so badly that I was injured                     | <input type="radio"/> Never <input type="radio"/> Once <input type="radio"/> 2-3 times <input type="radio"/> 4+ times |
| <b>PVS10</b> | Deliberately broken something that belongs to me        | <input type="radio"/> Never <input type="radio"/> Once <input type="radio"/> 2-3 times <input type="radio"/> 4+ times |
| <b>PVS11</b> | Tried to make other children turn against me            | <input type="radio"/> Never <input type="radio"/> Once <input type="radio"/> 2-3 times <input type="radio"/> 4+ times |
| <b>PVS12</b> | Stole something from me                                 | <input type="radio"/> Never <input type="radio"/> Once <input type="radio"/> 2-3 times <input type="radio"/> 4+ times |
| <b>PVS13</b> | Refused to talk to me                                   | <input type="radio"/> Never <input type="radio"/> Once <input type="radio"/> 2-3 times <input type="radio"/> 4+ times |
| <b>PVS14</b> | Made other people not talk to me                        | <input type="radio"/> Never <input type="radio"/> Once <input type="radio"/> 2-3 times <input type="radio"/> 4+ times |

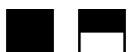

|              |                                        |                             |                            |                                 |                                |
|--------------|----------------------------------------|-----------------------------|----------------------------|---------------------------------|--------------------------------|
| <b>PVS15</b> | Deliberately damaged something of mine | <input type="radio"/> Never | <input type="radio"/> Once | <input type="radio"/> 2-3 times | <input type="radio"/> 4+ times |
|--------------|----------------------------------------|-----------------------------|----------------------------|---------------------------------|--------------------------------|

**Corporal Punishment School (CPS)**  
**Please make an X in the bubble of the best answer.**  
**How many times within the past 2 weeks...**

|             |                                                                        |                             |                            |                                 |                                |
|-------------|------------------------------------------------------------------------|-----------------------------|----------------------------|---------------------------------|--------------------------------|
| <b>CPS1</b> | Were you slapped, hit, beaten, or physically punished by a teacher?    | <input type="radio"/> Never | <input type="radio"/> Once | <input type="radio"/> 2-3 times | <input type="radio"/> 4+ times |
| <b>CPS2</b> | Have you been beaten so hard at school that you were injured?          | <input type="radio"/> Never | <input type="radio"/> Once | <input type="radio"/> 2-3 times | <input type="radio"/> 4+ times |
| <b>CPS3</b> | Did a teacher hit you with a stick, whip, strap, or other hard object? | <input type="radio"/> Never | <input type="radio"/> Once | <input type="radio"/> 2-3 times | <input type="radio"/> 4+ times |

**Physical Punishment At Home (PPH)**  
**Please make an X in the bubble of the best answer.**  
**How many times within the past 2 weeks...**

|             |                                                                                       |                             |                            |                                 |                                |
|-------------|---------------------------------------------------------------------------------------|-----------------------------|----------------------------|---------------------------------|--------------------------------|
| <b>PPH1</b> | Were you slapped, hit, beaten, or otherwise physically punished by a parent/guardian? | <input type="radio"/> Never | <input type="radio"/> Once | <input type="radio"/> 2-3 times | <input type="radio"/> 4+ times |
| <b>PPH2</b> | Have you been beaten so hard at home that you were injured?                           | <input type="radio"/> Never | <input type="radio"/> Once | <input type="radio"/> 2-3 times | <input type="radio"/> 4+ times |
| <b>PPH3</b> | Did a parent/guardian hit you with a stick, whip, strap, or other hard object?        | <input type="radio"/> Never | <input type="radio"/> Once | <input type="radio"/> 2-3 times | <input type="radio"/> 4+ times |

**Parent/Guardian Fighting (PF) & Abuse of Mother**  
**Please make an X in the bubble of the best answer.**  
**How many times within the past 2 weeks...**

|            |                                                                                              |                             |                            |                                 |                                |
|------------|----------------------------------------------------------------------------------------------|-----------------------------|----------------------------|---------------------------------|--------------------------------|
| <b>PF1</b> | Have you seen or heard that your father/male guardian had a physical fight with another man? | <input type="radio"/> Never | <input type="radio"/> Once | <input type="radio"/> 2-3 times | <input type="radio"/> 4+ times |
| <b>PF2</b> | Have you seen or heard your father/male guardian hit your mother/female guardian?            | <input type="radio"/> Never | <input type="radio"/> Once | <input type="radio"/> 2-3 times | <input type="radio"/> 4+ times |
| <b>PF3</b> | Have you seen your mother/female guardian being beaten by any of the family members?         | <input type="radio"/> Never | <input type="radio"/> Once | <input type="radio"/> 2-3 times | <input type="radio"/> 4+ times |

Have you ever had a boyfriend?  No  Yes  Don't Know

**Physical/Emotional IPV (pIPV/eIPV)**  
**Please make an X in the bubble of the best answer.**

|              |                                                                                                                                                |                             |                            |                                 |                                |
|--------------|------------------------------------------------------------------------------------------------------------------------------------------------|-----------------------------|----------------------------|---------------------------------|--------------------------------|
| <b>pIPV1</b> | How many times within the past 12 months has your current or a previous boyfriend slapped you or thrown something at you which could hurt you? | <input type="radio"/> Never | <input type="radio"/> Once | <input type="radio"/> 2-3 times | <input type="radio"/> 4+ times |
|--------------|------------------------------------------------------------------------------------------------------------------------------------------------|-----------------------------|----------------------------|---------------------------------|--------------------------------|

|              |                                                                                                                                                                                                                                     |                             |                            |                                 |                                |
|--------------|-------------------------------------------------------------------------------------------------------------------------------------------------------------------------------------------------------------------------------------|-----------------------------|----------------------------|---------------------------------|--------------------------------|
| <b>pIPV2</b> | How many times within the past 12 months has your current or a previous boyfriend pushed or shoved you?                                                                                                                             | <input type="radio"/> Never | <input type="radio"/> Once | <input type="radio"/> 2-3 times | <input type="radio"/> 4+ times |
| <b>pIPV3</b> | How many times within the past 12 months has your current or a previous boyfriend hit you with a fist or with something else which could hurt you?                                                                                  | <input type="radio"/> Never | <input type="radio"/> Once | <input type="radio"/> 2-3 times | <input type="radio"/> 4+ times |
| <b>pIPV4</b> | How many times within the past 12 months has your current or a previous boyfriend kicked, dragged, beat, choked, or burned you?                                                                                                     | <input type="radio"/> Never | <input type="radio"/> Once | <input type="radio"/> 2-3 times | <input type="radio"/> 4+ times |
| <b>pIPV5</b> | How many times within the past 12 months has your current or a previous boyfriend threatened to use or actually used a gun, knife or other weapon (any object that can be used to inflict harm) against you?                        | <input type="radio"/> Never | <input type="radio"/> Once | <input type="radio"/> 2-3 times | <input type="radio"/> 4+ times |
| <b>eIPV1</b> | How many times within the past 12 months has your current or a previous boyfriend insulted you or made you feel bad about yourself?                                                                                                 | <input type="radio"/> Never | <input type="radio"/> Once | <input type="radio"/> 2-3 times | <input type="radio"/> 4+ times |
| <b>eIPV2</b> | How many times within the past 12 months has your current or a previous boyfriend made fun of or humiliated you in front of other people?                                                                                           | <input type="radio"/> Never | <input type="radio"/> Once | <input type="radio"/> 2-3 times | <input type="radio"/> 4+ times |
| <b>eIPV3</b> | How many times in the past 12 months has your current or a previous boyfriend threatened to hurt you or done things to scare or intimidate you on purpose, for example by the way he looked at you, by yelling and smashing things? | <input type="radio"/> Never | <input type="radio"/> Once | <input type="radio"/> 2-3 times | <input type="radio"/> 4+ times |

**Sexual Behavior and First Time Assault/Coercion and Alcohol Questions**

|           |                                                                                                                                                       |                               |                               |                                       |                                             |                                            |                             |                                  |                               |
|-----------|-------------------------------------------------------------------------------------------------------------------------------------------------------|-------------------------------|-------------------------------|---------------------------------------|---------------------------------------------|--------------------------------------------|-----------------------------|----------------------------------|-------------------------------|
| <b>F1</b> | Have you ever had a sexual intercourse?                                                                                                               | <input type="radio"/> Yes     | <input type="radio"/> No      | <input type="radio"/> Don't Know      | <input type="radio"/> Refused               |                                            |                             |                                  |                               |
| <b>F2</b> | How old were you when you had sex for the first time?                                                                                                 | <input type="text" value=""/> | <input type="text" value=""/> | <input type="radio"/> Don't Know      | <input type="radio"/> Refused               | <input type="radio"/> N/A                  |                             |                                  |                               |
| <b>F3</b> | Has anyone ever given you money, food, gifts, or any favors to have sex with them?                                                                    | <input type="radio"/> Yes     | <input type="radio"/> No      | <input type="radio"/> Don't Know      | <input type="radio"/> Refused               |                                            |                             |                                  |                               |
| <b>F4</b> | How many times do you have a drink containing alcohol?<br><br>Alcohol includes things like beer, wine, chang'aa, palm wine, whiskey, gin, vodka, etc. | <input type="radio"/> Never   | <input type="radio"/> Once    | <input type="radio"/> Monthly or less | <input type="radio"/> A few times per month | <input type="radio"/> A few times per week | <input type="radio"/> Daily | <input type="radio"/> Don't Know | <input type="radio"/> Refused |

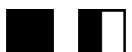

|           |                                                                                                |                                                                                                                                                                                                                                                                                              |
|-----------|------------------------------------------------------------------------------------------------|----------------------------------------------------------------------------------------------------------------------------------------------------------------------------------------------------------------------------------------------------------------------------------------------|
| <b>F5</b> | In the past 30 days, on how many days did you drink alcohol to the point that you become drunk | <input type="text"/> <input type="text"/> <input type="radio"/> N/A <input type="radio"/> Refused                                                                                                                                                                                            |
| <b>F6</b> | How many times do you use drugs, such as marijuana, glue sniffing, heroin, cocaine?            | <input type="radio"/> Never<br><input type="radio"/> Once<br><input type="radio"/> Monthly or less<br><input type="radio"/> A few times per month<br><input type="radio"/> A few times per week<br><input type="radio"/> Daily<br><input type="radio"/> N/A<br><input type="radio"/> Refused |

**Questions Regarding Boyfriend**

|            |                                                                                                                                                                                                                                                                                                                     |
|------------|---------------------------------------------------------------------------------------------------------------------------------------------------------------------------------------------------------------------------------------------------------------------------------------------------------------------|
| <b>BF1</b> | In the past 12 months, how many times has a current or a previous boyfriend ever physically forced you to have sex when you did not want to?<br><br><input type="radio"/> Never <input type="radio"/> Once <input type="radio"/> 2-3 times <input type="radio"/> 4+ times <input type="radio"/> N/A                 |
| <b>BF2</b> | In the past 12 months, how many times has your current or a previous boyfriend used threats or intimidation to get you to have sex when you did not want to?<br><br><input type="radio"/> Never <input type="radio"/> Once <input type="radio"/> 2-3 times <input type="radio"/> 4+ times <input type="radio"/> N/A |
| <b>BF3</b> | In the past 12 months, how many times has a current or your previous boyfriend ever forced you to do something else sexual that you did not want to do?<br><br><input type="radio"/> Never <input type="radio"/> Once <input type="radio"/> 2-3 times <input type="radio"/> 4+ times <input type="radio"/> N/A      |

**Non-Partner Sexual Violence Questions**

|              |                                                                                                                                  |                                                                                                                       |
|--------------|----------------------------------------------------------------------------------------------------------------------------------|-----------------------------------------------------------------------------------------------------------------------|
| <b>NPSV1</b> | In the past 12 months, how many times has a man who is NOT your boyfriend forced or persuaded you to have sex against your will? | <input type="radio"/> Never <input type="radio"/> Once <input type="radio"/> 2-3 times <input type="radio"/> 4+ times |
|--------------|----------------------------------------------------------------------------------------------------------------------------------|-----------------------------------------------------------------------------------------------------------------------|

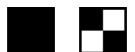

|              |                                                                                                                                                                                                                     |                                                                                                                                                                                                                                                                                                                                                                                                                                                                                                                                                                                                                                                                                                                                                                                                                                                                                                                                                                                                                                                                                                                                                                                                                                                                                                                                                                                                                                                                                                                                                                                                  |  |  |  |  |  |  |  |  |  |  |  |  |  |  |  |  |  |  |  |  |  |
|--------------|---------------------------------------------------------------------------------------------------------------------------------------------------------------------------------------------------------------------|--------------------------------------------------------------------------------------------------------------------------------------------------------------------------------------------------------------------------------------------------------------------------------------------------------------------------------------------------------------------------------------------------------------------------------------------------------------------------------------------------------------------------------------------------------------------------------------------------------------------------------------------------------------------------------------------------------------------------------------------------------------------------------------------------------------------------------------------------------------------------------------------------------------------------------------------------------------------------------------------------------------------------------------------------------------------------------------------------------------------------------------------------------------------------------------------------------------------------------------------------------------------------------------------------------------------------------------------------------------------------------------------------------------------------------------------------------------------------------------------------------------------------------------------------------------------------------------------------|--|--|--|--|--|--|--|--|--|--|--|--|--|--|--|--|--|--|--|--|--|
| <b>NPSV1</b> | Who forced or persuaded you to have sex against your will?<br><br>Please make an X in the bubbles of all answers that apply.                                                                                        | <div style="text-align: center;"> <input type="radio"/> Did not force/persuade others to have sex against their will<br/> <input type="radio"/> Family member/relative<br/> <input type="radio"/> Authority figure such as teacher or police<br/> <input type="radio"/> Other<br/> <input type="radio"/> Did not know them<br/> <input type="radio"/> Refused<br/> <input type="radio"/> N/A         </div> <div style="text-align: center; margin-top: 10px;">           Please Specify Other<br/> <table border="1" style="width: 100%; height: 20px; border-collapse: collapse;"> <tr> <td style="width: 20px; height: 20px;"></td> </tr> </table> </div> |  |  |  |  |  |  |  |  |  |  |  |  |  |  |  |  |  |  |  |  |  |
|              |                                                                                                                                                                                                                     |                                                                                                                                                                                                                                                                                                                                                                                                                                                                                                                                                                                                                                                                                                                                                                                                                                                                                                                                                                                                                                                                                                                                                                                                                                                                                                                                                                                                                                                                                                                                                                                                  |  |  |  |  |  |  |  |  |  |  |  |  |  |  |  |  |  |  |  |  |  |
| <b>NPSV2</b> | In the past 12 months, how many times has any man or boy who is NOT your boyfriend tried to force you to have sex against your will and did not succeed?                                                            | <input type="radio"/> Never <input type="radio"/> Once <input type="radio"/> 2-3 times <input type="radio"/> 4+ times                                                                                                                                                                                                                                                                                                                                                                                                                                                                                                                                                                                                                                                                                                                                                                                                                                                                                                                                                                                                                                                                                                                                                                                                                                                                                                                                                                                                                                                                            |  |  |  |  |  |  |  |  |  |  |  |  |  |  |  |  |  |  |  |  |  |
| <b>NPSV3</b> | In the past 12 months how many times has any man or boy who is NOT your boyfriend forced you to have sex against your will when you were too drunk or drugged to refuse?                                            | <input type="radio"/> Never <input type="radio"/> Once <input type="radio"/> 2-3 times <input type="radio"/> 4+ times                                                                                                                                                                                                                                                                                                                                                                                                                                                                                                                                                                                                                                                                                                                                                                                                                                                                                                                                                                                                                                                                                                                                                                                                                                                                                                                                                                                                                                                                            |  |  |  |  |  |  |  |  |  |  |  |  |  |  |  |  |  |  |  |  |  |
| <b>NPSV4</b> | In the last 12 months how many times did two or more men or boys force you to have sex with them at the same time against your will?                                                                                | <input type="radio"/> Never <input type="radio"/> Once <input type="radio"/> 2-3 times <input type="radio"/> 4+ times                                                                                                                                                                                                                                                                                                                                                                                                                                                                                                                                                                                                                                                                                                                                                                                                                                                                                                                                                                                                                                                                                                                                                                                                                                                                                                                                                                                                                                                                            |  |  |  |  |  |  |  |  |  |  |  |  |  |  |  |  |  |  |  |  |  |
| <b>NPSV5</b> | In the past 12 months how many times did two or more men or boys force you to have sex with them at the same time against your will when you were too drunk or drugged to refuse?                                   | <input type="radio"/> Never <input type="radio"/> Once <input type="radio"/> 2-3 times <input type="radio"/> 4+ times                                                                                                                                                                                                                                                                                                                                                                                                                                                                                                                                                                                                                                                                                                                                                                                                                                                                                                                                                                                                                                                                                                                                                                                                                                                                                                                                                                                                                                                                            |  |  |  |  |  |  |  |  |  |  |  |  |  |  |  |  |  |  |  |  |  |
| <b>NPSV6</b> | In the past 12 months how many times was there an occasion when you agreed to have sex with one man or boy and one or more others who you had not agreed to have sex with forced you to have sex with them as well? | <input type="radio"/> Never <input type="radio"/> Once <input type="radio"/> 2-3 times <input type="radio"/> 4+ times                                                                                                                                                                                                                                                                                                                                                                                                                                                                                                                                                                                                                                                                                                                                                                                                                                                                                                                                                                                                                                                                                                                                                                                                                                                                                                                                                                                                                                                                            |  |  |  |  |  |  |  |  |  |  |  |  |  |  |  |  |  |  |  |  |  |

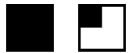

**NPSV7**

Where were you the most recent time someone forced you to have sex?

- My home
- Perpetrator's home
- Someone else's home
- Party
- Public Event
- School
- Car/Bus
- Travelling by foot
- Other locations
- Don't Know
- Refused

Please Specify Other

|  |  |  |  |  |  |  |  |  |  |  |  |  |  |  |  |  |  |  |  |  |
|--|--|--|--|--|--|--|--|--|--|--|--|--|--|--|--|--|--|--|--|--|
|  |  |  |  |  |  |  |  |  |  |  |  |  |  |  |  |  |  |  |  |  |
|--|--|--|--|--|--|--|--|--|--|--|--|--|--|--|--|--|--|--|--|--|

**NPSV8**

What was going on just before this happened?

- On date
- At party
- Fighting with perpetrator
- Fighting with family
- Going to public event
- At public event
- Going for water
- Going shopping
- Other situations
- Don't Know
- N/A

Please Specify Other

|  |  |  |  |  |  |  |  |  |  |  |  |  |  |  |  |  |  |  |  |  |
|--|--|--|--|--|--|--|--|--|--|--|--|--|--|--|--|--|--|--|--|--|
|  |  |  |  |  |  |  |  |  |  |  |  |  |  |  |  |  |  |  |  |  |
|--|--|--|--|--|--|--|--|--|--|--|--|--|--|--|--|--|--|--|--|--|

**NPSV9**

About what time of day did this happen?

- Morning
- Afternoon
- Evening
- Late at night
- Don't Know
- N/A



|               |                                                                                                                                                                                      |                                                                                                                                                                                                                                                                                                                                                                                                                                                           |
|---------------|--------------------------------------------------------------------------------------------------------------------------------------------------------------------------------------|-----------------------------------------------------------------------------------------------------------------------------------------------------------------------------------------------------------------------------------------------------------------------------------------------------------------------------------------------------------------------------------------------------------------------------------------------------------|
| <b>NPSV10</b> | Have you ever gotten pregnant as a result of being forced to have sex?                                                                                                               | <input type="radio"/> Yes <input type="radio"/> No <input type="radio"/> Refused to answer <input type="radio"/> N/A                                                                                                                                                                                                                                                                                                                                      |
| <b>NPSV11</b> | Have you ever gone for an HIV test as a result of being forced to have sex?                                                                                                          | <input type="radio"/> Yes <input type="radio"/> No <input type="radio"/> Refused to answer <input type="radio"/> N/A                                                                                                                                                                                                                                                                                                                                      |
| <b>NPSV12</b> | How many times in your life have you been forced to have sex against your will?                                                                                                      | <input type="radio"/> Never <input type="radio"/> Once <input type="radio"/> Don't Know <input type="radio"/> Refused to answer<br><br><input type="radio"/> N/A<br><br>Write number if 2 times or more: <input type="text"/> <input type="text"/>                                                                                                                                                                                                        |
| <b>NPSV13</b> | If you know any of the people who did this to you, can you tell me the number of times they forced you to have sex?<br><br>Please make an X in the bubbles of all answers that apply | <input type="radio"/> Boyfriend or Partner <input type="text"/> <input type="text"/><br><input type="radio"/> Family member or relative <input type="text"/> <input type="text"/><br><input type="radio"/> Authority Figure (teacher/police) <input type="text"/> <input type="text"/><br><input type="radio"/> I did not know them <input type="text"/> <input type="text"/><br><input type="radio"/> Refused to answer<br><br><input type="radio"/> N/A |
| <b>NPSV14</b> | Did you ever tell anybody about any of these incidents?                                                                                                                              | <input type="radio"/> Yes <input type="radio"/> No <input type="radio"/> Don't Know <input type="radio"/> N/A                                                                                                                                                                                                                                                                                                                                             |

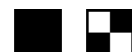



|     |                                                                                   |                                       |                                         |                                          |                                 |                                      |
|-----|-----------------------------------------------------------------------------------|---------------------------------------|-----------------------------------------|------------------------------------------|---------------------------------|--------------------------------------|
| 4.  | How well can you study when there are other interesting things to do?             | <input type="radio"/> 1<br>Not at all | <input type="radio"/> 2<br>A little bit | <input type="radio"/> 3<br>About average | <input type="radio"/> 4<br>Well | <input type="radio"/> 5<br>Very Well |
| 5.  | How well do you succeed in becoming calm again when you are very scared?          | <input type="radio"/> 1<br>Not at all | <input type="radio"/> 2<br>A little bit | <input type="radio"/> 3<br>About average | <input type="radio"/> 4<br>Well | <input type="radio"/> 5<br>Very Well |
| 6.  | How well can you become friends with other children?                              | <input type="radio"/> 1<br>Not at all | <input type="radio"/> 2<br>A little bit | <input type="radio"/> 3<br>About average | <input type="radio"/> 4<br>Well | <input type="radio"/> 5<br>Very Well |
| 7.  | How well can you study a chapter for a test?                                      | <input type="radio"/> 1<br>Not at all | <input type="radio"/> 2<br>A little bit | <input type="radio"/> 3<br>About average | <input type="radio"/> 4<br>Well | <input type="radio"/> 5<br>Very Well |
| 8.  | How well can you have a chat with an unfamiliar person?                           | <input type="radio"/> 1<br>Not at all | <input type="radio"/> 2<br>A little bit | <input type="radio"/> 3<br>About average | <input type="radio"/> 4<br>Well | <input type="radio"/> 5<br>Very Well |
| 9.  | How well can you prevent to become nervous?                                       | <input type="radio"/> 1<br>Not at all | <input type="radio"/> 2<br>A little bit | <input type="radio"/> 3<br>About average | <input type="radio"/> 4<br>Well | <input type="radio"/> 5<br>Very Well |
| 10. | How well do you succeed in finishing all your homework every day?                 | <input type="radio"/> 1<br>Not at all | <input type="radio"/> 2<br>A little bit | <input type="radio"/> 3<br>About average | <input type="radio"/> 4<br>Well | <input type="radio"/> 5<br>Very Well |
| 11. | How well can you work in harmony with your classmates?                            | <input type="radio"/> 1<br>Not at all | <input type="radio"/> 2<br>A little bit | <input type="radio"/> 3<br>About average | <input type="radio"/> 4<br>Well | <input type="radio"/> 5<br>Very Well |
| 12. | How well can you control your feelings?                                           | <input type="radio"/> 1<br>Not at all | <input type="radio"/> 2<br>A little bit | <input type="radio"/> 3<br>About average | <input type="radio"/> 4<br>Well | <input type="radio"/> 5<br>Very Well |
| 13. | How well can you pay attention during every class?                                | <input type="radio"/> 1<br>Not at all | <input type="radio"/> 2<br>A little bit | <input type="radio"/> 3<br>About average | <input type="radio"/> 4<br>Well | <input type="radio"/> 5<br>Very Well |
| 14. | How well can you tell other children that they're doing something you don't like? | <input type="radio"/> 1<br>Not at all | <input type="radio"/> 2<br>A little bit | <input type="radio"/> 3<br>About average | <input type="radio"/> 4<br>Well | <input type="radio"/> 5<br>Very Well |
| 15. | How well can you give yourself a pep-talk when you feel low?                      | <input type="radio"/> 1<br>Not at all | <input type="radio"/> 2<br>A little bit | <input type="radio"/> 3<br>About average | <input type="radio"/> 4<br>Well | <input type="radio"/> 5<br>Very Well |
| 16. | How well do you succeed in understanding all subjects in school?                  | <input type="radio"/> 1<br>Not at all | <input type="radio"/> 2<br>A little bit | <input type="radio"/> 3<br>About average | <input type="radio"/> 4<br>Well | <input type="radio"/> 5<br>Very Well |
| 17. | How well can you tell a funny event to a group of children?                       | <input type="radio"/> 1<br>Not at all | <input type="radio"/> 2<br>A little bit | <input type="radio"/> 3<br>About average | <input type="radio"/> 4<br>Well | <input type="radio"/> 5<br>Very Well |
| 18. | How well can you tell a friend that you don't feel well?                          | <input type="radio"/> 1<br>Not at all | <input type="radio"/> 2<br>A little bit | <input type="radio"/> 3<br>About average | <input type="radio"/> 4<br>Well | <input type="radio"/> 5<br>Very Well |

|     |                                                                                    |                                       |                                         |                                          |                                 |                                      |
|-----|------------------------------------------------------------------------------------|---------------------------------------|-----------------------------------------|------------------------------------------|---------------------------------|--------------------------------------|
| 19. | How well do you succeed in satisfying your parents/guardians with your schoolwork? | <input type="radio"/> 1<br>Not at all | <input type="radio"/> 2<br>A little bit | <input type="radio"/> 3<br>About average | <input type="radio"/> 4<br>Well | <input type="radio"/> 5<br>Very Well |
| 20. | How well do you succeed in staying friends with other children?                    | <input type="radio"/> 1<br>Not at all | <input type="radio"/> 2<br>A little bit | <input type="radio"/> 3<br>About average | <input type="radio"/> 4<br>Well | <input type="radio"/> 5<br>Very Well |
| 21. | How well do you succeed in suppressing unpleasant thoughts?                        | <input type="radio"/> 1<br>Not at all | <input type="radio"/> 2<br>A little bit | <input type="radio"/> 3<br>About average | <input type="radio"/> 4<br>Well | <input type="radio"/> 5<br>Very Well |
| 22. | How well do you succeed in passing a test?                                         | <input type="radio"/> 1<br>Not at all | <input type="radio"/> 2<br>A little bit | <input type="radio"/> 3<br>About average | <input type="radio"/> 4<br>Well | <input type="radio"/> 5<br>Very Well |
| 23. | How well do you succeed in preventing quarrels with other children?                | <input type="radio"/> 1<br>Not at all | <input type="radio"/> 2<br>A little bit | <input type="radio"/> 3<br>About average | <input type="radio"/> 4<br>Well | <input type="radio"/> 5<br>Very Well |
| 24. | How well do you succeed in not worrying about things that might happen?            | <input type="radio"/> 1<br>Not at all | <input type="radio"/> 2<br>A little bit | <input type="radio"/> 3<br>About average | <input type="radio"/> 4<br>Well | <input type="radio"/> 5<br>Very Well |

### Self-Esteem: Rosenberg's Self Esteem Scale

Please make an X in the bubble of the best answer

|    |                                                                            |                                      |                             |                                |                                         |
|----|----------------------------------------------------------------------------|--------------------------------------|-----------------------------|--------------------------------|-----------------------------------------|
| 1. | I feel that I am a person of worth, at least on an equal plane with others | <input type="radio"/> Strongly Agree | <input type="radio"/> Agree | <input type="radio"/> Disagree | <input type="radio"/> Strongly Disagree |
| 2. | I feel that I have a number of good qualities                              | <input type="radio"/> Strongly Agree | <input type="radio"/> Agree | <input type="radio"/> Disagree | <input type="radio"/> Strongly Disagree |
| 3. | All in all, I am inclined to feel that I am a failure                      | <input type="radio"/> Strongly Agree | <input type="radio"/> Agree | <input type="radio"/> Disagree | <input type="radio"/> Strongly Disagree |
| 4. | I am able to do things as well as most other people                        | <input type="radio"/> Strongly Agree | <input type="radio"/> Agree | <input type="radio"/> Disagree | <input type="radio"/> Strongly Disagree |
| 5. | I feel I do not have much to be proud of                                   | <input type="radio"/> Strongly Agree | <input type="radio"/> Agree | <input type="radio"/> Disagree | <input type="radio"/> Strongly Disagree |
| 6. | I take a positive attitude toward myself                                   | <input type="radio"/> Strongly Agree | <input type="radio"/> Agree | <input type="radio"/> Disagree | <input type="radio"/> Strongly Disagree |
| 7. | On the whole, I am satisfied with myself                                   | <input type="radio"/> Strongly Agree | <input type="radio"/> Agree | <input type="radio"/> Disagree | <input type="radio"/> Strongly Disagree |
| 8. | I wish I could have more respect for myself                                | <input type="radio"/> Strongly Agree | <input type="radio"/> Agree | <input type="radio"/> Disagree | <input type="radio"/> Strongly Disagree |

|     |                                       |                                      |                             |                                |                                         |
|-----|---------------------------------------|--------------------------------------|-----------------------------|--------------------------------|-----------------------------------------|
| 9.  | I certainly feel useless at times     | <input type="radio"/> Strongly Agree | <input type="radio"/> Agree | <input type="radio"/> Disagree | <input type="radio"/> Strongly Disagree |
| 10. | At times, I think I am no good at all | <input type="radio"/> Strongly Agree | <input type="radio"/> Agree | <input type="radio"/> Disagree | <input type="radio"/> Strongly Disagree |

### Ideas About Gender Relations

Now I would like to ask your opinion on some statements on relations between men and women, can you tell me if you strongly agree, agree, disagree or strongly disagree with the following statements:

|     |                                                                                             |                                      |                             |                                |                                         |
|-----|---------------------------------------------------------------------------------------------|--------------------------------------|-----------------------------|--------------------------------|-----------------------------------------|
| 1.  | A woman should listen to her husband                                                        | <input type="radio"/> Strongly Agree | <input type="radio"/> Agree | <input type="radio"/> Disagree | <input type="radio"/> Strongly Disagree |
| 2.  | A woman has to teach her man to respect her                                                 | <input type="radio"/> Strongly Agree | <input type="radio"/> Agree | <input type="radio"/> Disagree | <input type="radio"/> Strongly Disagree |
| 3.  | A woman should choose her own friends even if her boyfriend or husband disagrees            | <input type="radio"/> Strongly Agree | <input type="radio"/> Agree | <input type="radio"/> Disagree | <input type="radio"/> Strongly Disagree |
| 4.  | Men should share the work around the home such as doing the dishes or cleaning or cooking   | <input type="radio"/> Strongly Agree | <input type="radio"/> Agree | <input type="radio"/> Disagree | <input type="radio"/> Strongly Disagree |
| 5.  | Sometimes a man may have a good reason to hit his girlfriend                                | <input type="radio"/> Strongly Agree | <input type="radio"/> Agree | <input type="radio"/> Disagree | <input type="radio"/> Strongly Disagree |
| 6.  | A woman can refuse to have sex with her husband if she does not want it for any reason      | <input type="radio"/> Strongly Agree | <input type="radio"/> Agree | <input type="radio"/> Disagree | <input type="radio"/> Strongly Disagree |
| 7.  | If a wife does something wrong she should expect her husband to punish her                  | <input type="radio"/> Strongly Agree | <input type="radio"/> Agree | <input type="radio"/> Disagree | <input type="radio"/> Strongly Disagree |
| 8.  | A woman has to know how to look after herself as she cannot rely on her man to care for her | <input type="radio"/> Strongly Agree | <input type="radio"/> Agree | <input type="radio"/> Disagree | <input type="radio"/> Strongly Disagree |
| 9.  | A man cannot control himself when he wants sex                                              | <input type="radio"/> Strongly Agree | <input type="radio"/> Agree | <input type="radio"/> Disagree | <input type="radio"/> Strongly Disagree |
| 10. | A woman should expect to be taught how to behave by her boyfriend                           | <input type="radio"/> Strongly Agree | <input type="radio"/> Agree | <input type="radio"/> Disagree | <input type="radio"/> Strongly Disagree |
| 11. | A woman should not expect the fathers of her children to give her money                     | <input type="radio"/> Strongly Agree | <input type="radio"/> Agree | <input type="radio"/> Disagree | <input type="radio"/> Strongly Disagree |
| 12. | If a woman drinks alcohol and wears miniskirts she is asking for trouble                    | <input type="radio"/> Strongly Agree | <input type="radio"/> Agree | <input type="radio"/> Disagree | <input type="radio"/> Strongly Disagree |
